# Supplementary material for: Drought and Plant Community Composition Affect the Metabolic and Genotypic Diversity of Pseudomonas Strains in Grassland Soils
Source: Microorganisms. 2021 Aug 7;9(8):1677. doi: 10.3390/microorganisms9081677 (PMC8399733; doi:10.3390/microorganisms9081677)
Supplement: Supplementary file 1 [file microorganisms-09-01677-s001.zip › Supplementary_Tables.xlsx]

## Sheet: Table S1
Table S1. Subset of the Miniplot experiment used with respective plant species pool.
Plotcode	Origin	Treatment	Grasses (Mix-Plots: 1/2= NE-species, 1/2= SW-species)				Legumes (Mix-Plots: 1/2= NE-species, 1/2= SW-species)				Small Herbs (Mix-Plots: 1/2= NE-species, 1/2= SW-species)				Tall Herbs (Mix-Plots: 1/2= NE-species, 1/2= SW-species)
			1	2	3	4	1	2	3	4	1	2	3	4	1	2	3	4
B1D02	NE	Drought	Agr cap	Bri med	Hel pub	Hol lan	Gen tin	Lup pol	Tri med	Tri pra	Car vul	Pri ver	Pru vul	Sax gra	Cam per	Gal alb	Pim maj	Sil lat		Agr cap	Agrostis capillaris
B1D06	NE	Drought	Agr cap	Arr ela NE	Bri med	Hel pub	Gen tin	Lup pol	Tri med	Vic sep	Car vul	Leo aut	Pri ver	Sax gra	Cre bie	Gal alb	Pim maj	Sil lat		Arr ela NE	Arrhenatherum elatius (variant with main distribution in NE-Europe)
B1D07	MIX	Drought	Fes pra NE	Hol lan	Fes pra SW	Poa ang	Lat syl	Tri pra	Gal off	Hip com	Pru vul	Ver cha	Cre cap	Hyp rad	Cam per	Kna arv	Leu vul	Lin aus		Arr ela SW	Arrhenatherum elatius (variant with main distribution in SW-Europe)
B1D10	NE	Drought	Arr ela NE	Cyn cri	Dac glo	Fes pra NE	Lat pra	Lat syl	Tri rep	Vic sep	Cam pat	Ger pra	Leo aut	Ver cha	Agr eup	Cre bie	Ger pyr	Kna arv		Bra pin	Brachypodium pinnatum
B1D11	SW	Drought	Bra pin	Bro tec	Fes gue	Fes rub	Med lup	Med var	Sec var	Vic cra	Cam rot	Pla med	San min	Sil vul	Dau car	Gal ver	Pic hie	Tra dub		Bri med	Briza media
B1D14	MIX	Drought	Bri med	Fes pra NE	Fes pra SW	Poa ang	Gen tin	Lat syl	Gal off	Hip com	Car vul	Ver cha	Cre cap	Hyp rad	Kna arv	Pim maj	Leu vul	Lin aus		Bro hor	Bromus hordeaceus
B1D19	SW	Drought	Bro hor	Bro tec	Fes rub	Poa ang	Hip com	Lot cor	Med var	Vic cra	Cre cap	Hyp per	San min	Sil vul	Dia gig	Gal ver	Lin aus	Tra dub		Bro tec	Bromus tectorum
B1D21	SW	Drought	Arr ela SW	Bra pin	Fes pra SW	Fes rub	Gal off	Med lup	Med var	Vic tet	Cam rot	Hyp rad	Pla lan	San min	Cic int	Gal ver	Leu vul	Pic hie		Cyn cri	Cynosurus cristatus
B2C03	NE	Control	Arr ela NE	Cyn cri	Dac glo	Fes pra NE	Lat pra	Lat syl	Tri rep	Vic sep	Cam pat	Ger pra	Leo aut	Ver cha	Agr eup	Cre bie	Ger pyr	Kna arv		Dac glo	Dactylis glomerata
B2C11	MIX	Control	Fes pra NE	Hol lan	Fes pra SW	Poa ang	Lat syl	Tri pra	Gal off	Hip com	Pru vul	Ver cha	Cre cap	Hyp rad	Cam per	Kna arv	Leu vul	Lin aus		Fes gue	Festuca guestfalica
B2C13	SW	Control	Arr ela SW	Bra pin	Fes pra SW	Fes rub	Gal off	Med lup	Med var	Vic tet	Cam rot	Hyp rad	Pla lan	San min	Cic int	Gal ver	Leu vul	Pic hie		Fes pra NE	Festuca pratensis (variant with main distribution in NE-Europe)
B2C17	SW	Control	Bra pin	Bro tec	Fes gue	Fes rub	Med lup	Med var	Sec var	Vic cra	Cam rot	Pla med	San min	Sil vul	Dau car	Gal ver	Pic hie	Tra dub		Fes pra SW	Festuca pratensis (variant with main distribution in SW-Europe)
B2C19	MIX	Control	Bri med	Fes pra NE	Fes pra SW	Poa ang	Gen tin	Lat syl	Gal off	Hip com	Car vul	Ver cha	Cre cap	Hyp rad	Kna arv	Pim maj	Leu vul	Lin aus		Fes rub	Festuca rubra
B2C20	NE	Control	Agr cap	Bri med	Hel pub	Hol lan	Gen tin	Lup pol	Tri med	Tri pra	Car vul	Pri ver	Pru vul	Sax gra	Cam per	Gal alb	Pim maj	Sil lat		Hel pub	Helictotrichon pubescens
B2C24	SW	Control	Bro hor	Bro tec	Fes rub	Poa ang	Hip com	Lot cor	Med var	Vic cra	Cre cap	Hyp per	San min	Sil vul	Dia gig	Gal ver	Lin aus	Tra dub		Hol lan	Holcus lanatus
B2C25	NE	Control	Agr cap	Arr ela NE	Bri med	Hel pub	Gen tin	Lup pol	Tri med	Vic sep	Car vul	Leo aut	Pri ver	Sax gra	Cre bie	Gal alb	Pim maj	Sil lat		Poa ang	Poa angustifolia
B3D28	NE	Drought	Agr cap	Cyn cri	Fes pra NE	Hol lan	Lat syl	Lup pol	Tri pra	Tri rep	Cam pat	Pri ver	Pru vul	Ver cha	Agr eup	Cam per	Kna arv	Sil lat
B3D29	SW	Drought	Arr ela SW	Fes pra SW	Fes rub	Poa ang	Gal off	Hip com	Med var	Vic tet	Cre cap	Hyp rad	Pla lan	San min	Cic int	Gal ver	Leu vul	Lin aus		Gal off	Galega officinalis
B3D30	MIX	Drought	Agr cap	Fes pra NE	Fes pra SW	Fes rub	Lat syl	Lup pol	Gal off	Med var	Pri ver	Ver cha	Hyp rad	San min	Kna arv	Sil lat	Gal ver	Leu vul		Gen tin	Genista tinctoria
B3D32	MIX	Drought	Dac glo	Hel pub	Arr ela SW	Bro tec	Lat pra	Tri med	Vic cra	Vic tet	Ger pra	Sax gra	Pla lan	Sil vul	Gal alb	Ger pyr	Cic int	Tra dub		Hip com	Hippocrepis comosa
B3D34	SW	Drought	Arr ela SW	Bro hor	Fes gue	Poa ang	Hip com	Lot cor	Sec var	Vic tet	Cre cap	Hyp per	Pla lan	Pla med	Cic int	Dau car	Dia gig	Lin aus		Lat pra	Lathyrus pratensis
B3D35	MIX	Drought	Bri med	Hol lan	Bra pin	Fes gue	Gen tin	Tri pra	Med lup	Sec var	Car vul	Pru vul	Cam rot	Pla med	Cam per	Pim maj	Dau car	Pic hie		Lat syl	Lathyrus sylvestris
B3D39	NE	Drought	Agr cap	Arr ela NE	Bri med	Hol lan	Gen tin	Lup pol	Tri pra	Vic sep	Car vul	Leo aut	Pri ver	Pru vul	Cam per	Cre bie	Pim maj	Sil lat		Lot cor	Lotus corniculatus
B4C27	SW	Control	Arr ela SW	Fes pra SW	Fes rub	Poa ang	Gal off	Hip com	Med var	Vic tet	Cre cap	Hyp rad	Pla lan	San min	Cic int	Gal ver	Leu vul	Lin aus		Lup pol	Lupinus polyphyllus
B4C30	MIX	Control	Dac glo	Hel pub	Arr ela SW	Bro tec	Lat pra	Tri med	Vic cra	Vic tet	Ger pra	Sax gra	Pla lan	Sil vul	Gal alb	Ger pyr	Cic int	Tra dub		Med lup	Medicago lupulina
B4C32	MIX	Control	Agr cap	Fes pra NE	Fes pra SW	Fes rub	Lat syl	Lup pol	Gal off	Med var	Pri ver	Ver cha	Hyp rad	San min	Kna arv	Sil lat	Gal ver	Leu vul		Med var	Medicago x varia
B4C36	SW	Control	Arr ela SW	Bro hor	Fes gue	Poa ang	Hip com	Lot cor	Sec var	Vic tet	Cre cap	Hyp per	Pla lan	Pla med	Cic int	Dau car	Dia gig	Lin aus		Sec var	Securigera varia
B4C37	MIX	Control	Bri med	Hol lan	Bra pin	Fes gue	Gen tin	Tri pra	Med lup	Sec var	Car vul	Pru vul	Cam rot	Pla med	Cam per	Pim maj	Dau car	Pic hie		Tri med	Trifolium medium
B4C38	NE	Control	Agr cap	Arr ela NE	Bri med	Hol lan	Gen tin	Lup pol	Tri pra	Vic sep	Car vul	Leo aut	Pri ver	Pru vul	Cam per	Cre bie	Pim maj	Sil lat		Tri pra	Trifolium pratense
B4C39	NE	Control	Cyn cri	Dac glo	Fes pra NE	Hel pub	Lat pra	Lat syl	Tri med	Tri rep	Cam pat	Ger pra	Sax gra	Ver cha	Agr eup	Gal alb	Ger pyr	Kna arv		Tri rep	Trifolium repens
																				Vic cra	Vicia cracca
B1-B4	Blocks 1-4																			Vic sep	Vicia sepium
C	Control plots (without roofing) with continuous numbers 1-40 in the overall experimental design of the Miniplot experiment (n=40) (Figure S1)																			Vic tet	Vicia tetrasperma
D	Drought plots (roofed) with continuous numbers 1-40 in the overall experimental design of the Miniplot experiment (n=40) (Figure S1)
																				Cam pat	Campanula patula
																				Cam rot	Campanula rotundifolia
																				Car vul	Carlina vulgaris
																				Cre cap	Crepis capillaris
																				Ger pra	Geranium pratense
																				Hyp per	Hypericum perforatum
																				Hyp rad	Hypochaeris radicata
																				Leo aut	Leontodon autumnalis
																				Pla lan	Plantago lanceolata
																				Pla med	Plantago media
																				Pri ver	Primula veris
																				Pru vul	Prunella vulgaris
																				San min	Sanguisorba minor minor
																				Sax gra	Saxifraga granulata
																				Sil vul	Silene vulgaris
																				Ver cha	Veronica chamaedrys
																				Agr eup	Agrimonia eupatoria
																				Cam per	Campanula persicifolia
																				Cic int	Cichorium intybus
																				Cre bie	Crepis biennis
																				Dau car	Daucus carota
																				Dia gig	Dianthus giganteus
																				Gal alb	Galium album
																				Gal ver	Galium verum
																				Ger pyr	Geranium pyrenaicum
																				Kna arv	Knautia arvensis
																				Leu vul	Leucanthemum vulgare
																				Lin aus	Linum austriacum
																				Pic hie	Picris hieracioides
																				Pim maj	Pimpinella major
																				Sil lat	Silene latifolia
																				Tra dub	Tragopogon dubius

## Sheet: Table S2
Table S2 Percentage of sown species in the plots.
			% sown species
Plotcode	Origin	Treatment	June	September
B1D02	NE	Drought	98	91
B1D06	NE	Drought	99	98
B1D07	MIX	Drought	92	96
B1D10	NE	Drought	84	79
B1D11	SW	Drought	95	80
B1D14	MIX	Drought	96	91
B1D19	SW	Drought	94	71
B1D21	SW	Drought	98	96
B2C03	NE	Control	88	86
B2C11	MIX	Control	99	95
B2C13	SW	Control	93	81
B2C17	SW	Control	95	95
B2C19	MIX	Control	98	95
B2C20	NE	Control	100	90
B2C24	SW	Control	93	98
B2C25	NE	Control	81	100
B3D28	NE	Drought	98	87
B3D29	SW	Drought	89	100
B3D30	MIX	Drought	97	91
B3D32	MIX	Drought	93	83
B3D34	SW	Drought	95	99
B3D35	MIX	Drought	97	100
B3D39	NE	Drought	86	99
B4C27	SW	Control	95	82
B4C30	MIX	Control	96	87
B4C32	MIX	Control	92	90
B4C36	SW	Control	46	100
B4C37	MIX	Control	96	100
B4C38	NE	Control	96	85
B4C39	NE	Control	84	93

## Sheet: Table S3
Table S3 Effects of season, drought, and plant community origin on soil chemical parameters in 2012.
	Season			Treatment			Plant community composition
	June	September		Control	Drought		NE	SW	MIX
Moisture (% w/w)	11.4 ± 4.0 a	8.9 ± 2.6 b		13.1 ± 2.5 a	7.2 ± 1.0 b		10.0 ± 3.8	10.2 ± 3.5	10.2 ± 3.5
pH	7.46 ± 0.05	7.48 ± 0.08		7.45 ± 0.06	7.49 ± 0.06		7.46 ± 0.07	7.50 ± 0.05	7.45 ± 0.08
TOC (%)	1.88 ± 0.09 b	1.94 ± 0.09 a		1.90 ± 0.09	1.92 ± 0.10		1.90 ± 0.09	1.89 ± 0.10	1.93 ± 0.09
TN (%)	0.15 ± 0.01	0.15 ± 0.01		0.15 ± 0.01	0.15 ± 0.01		0.15 ± 0.01	0.15 ± 0.01	0.15 ± 0.01
PDL (mg/kg)	136 ± 26	142 ± 26		126 ± 20 b	153 ± 25 a		136 ± 23	142 ± 31	140 ± 26
Values represent means ± standard deviations; TOC: total organic carbon, TN: total nitrogen, PDL: available phosphorous. Bold values indicate significant differences within a factor (season, drought treatment, or plant community origin) and corresponding significance levels based on Tukey’s HSD test are indicated by superscript letters.

## Sheet: Table S4
Table S4 List of bacterial isolates.
Isolates	Season	Plant Origin	Length	Covering	Identity	Pseudomonas species
B1D07-PSIA-2-1	June	Mix	701	654	0.93	P. vancouverensis
B1D07-PSIA-2-11	June	Mix	1001	994	0.99	P. fluorescens
B1D07-PSIA-2-12	June	Mix	1001	998	0.99	P. putida
B1D07-PSIA-2-13	June	Mix	1001	998	0.99	P. fluorescens
B1D07-PSIA-2-2	June	Mix	1001	998	0.99	P. vancouverensis
B1D07-PSIA-2-3	June	Mix	1001	998	0.99	P. vancouverensis
B1D07-PSIA-2-4	June	Mix	1001	1001	1	P. helmanticensis
B1D07-PSIA-2-5	June	Mix	1001	1000	0.99	P. helmanticensis
B1D07-PSIA-2-7	June	Mix	1001	994	0.99	P. fluorescens
B1D07-PSIA-2-8	June	Mix	1001	1001	1	P. helmanticensis
B1D07-PSIA-2-9	June	Mix	1001	999	0.99	P. lini
B1D10-PSIA-2-1	June	NE	1001	998	0.99	P. koreensis
B1D10-PSIA-2-10	June	NE	1001	998	0.99	P. fluorescens
B1D10-PSIA-2-2	June	NE	1001	998	0.99	P. fluorescens
B1D10-PSIA-2-3	June	NE	1001	998	0.99	P. fluorescens
B1D10-PSIA-2-4	June	NE	1001	997	0.99	P. koreensis
B1D10-PSIA-2-5	June	NE	1001	998	0.99	P. fluorescens
B1D10-PSIA-2-6	June	NE	1001	998	0.99	P. fluorescens
B1D10-PSIA-2-7	June	NE	1001	999	0.99	P. koreensis
B1D10-PSIA-2-8	June	NE	1001	998	0.99	P. koreensis
B1D10-PSIA-2-9	June	NE	1001	998	0.99	P. koreensis
B1D14-PSIA-2-1	June	Mix	1001	1000	0.99	P. abientaniphila
B1D14-PSIA-2-2	June	Mix	1001	998	0.99	P. fluorescens
B1D14-PSIA-2-7	June	Mix	1001	998	0.99	P. baetica
B1D14-PSIA-2-8	June	Mix	1001	998	0.99	P. koreensis
B1D19-PSIA-2-1	June	SW	1001	996	0.99	P. helmanticensis
B1D19-PSIA-2-2	June	SW	1001	996	0.99	P. helmanticensis
B1D19-PSIA-2-3	June	SW	1001	996	0.99	P. helmanticensis
B1D19-PSIA-2-4	June	SW	1001	989	0.99	P. fluorescens
B1D19-PSIA-2-5	June	SW	1001	996	0.99	P. helmanticensis
B1D19-PSIA-2-6	June	SW	1001	996	0.99	P. helmanticensis
B1D19-PSIA-2-7	June	SW	975	973	0.99	P. putida
B1D19-PSIA-2-8	June	SW	1001	998	0.99	P. koreensis
B1D21-PSIA-2-1	June	SW	1001	1001	1	P. putida
B1D21-PSIA-2-10	June	SW	1001	999	0.99	P. koreensis
B1D21-PSIA-2-11	June	SW	1001	998	0.99	P. helmanticensis
B1D21-PSIA-2-12	June	SW	1001	998	0.99	P. baetica
B1D21-PSIA-2-13	June	SW	1001	999	0.99	P. koreensis
B1D21-PSIA-2-14	June	SW	1001	998	0.99	P. baetica
B1D21-PSIA-2-15	June	SW	1001	999	0.99	P. koreensis
B1D21-PSIA-2-16	June	SW	1001	999	0.99	P. koreensis
B1D21-PSIA-2-2	June	SW	1001	999	0.99	P. koreensis
B1D21-PSIA-2-3	June	SW	1001	999	0.99	P. koreensis
B1D21-PSIA-2-4	June	SW	1001	999	0.99	P. koreensis
B1D21-PSIA-2-5	June	SW	1001	998	0.99	P. helmanticensis
B1D21-PSIA-2-6	June	SW	1001	998	0.99	P. helmanticensis
B1D21-PSIA-2-8	June	SW	1001	999	0.99	P. helmanticensis
B1D21-PSIA-2-9	June	SW	1001	998	0.99	P. helmanticensis
B2C03-PSIA-2-2	June	NE	1001	998	0.99	P. helmanticensis
B2C03-PSIA-2-3	June	NE	1001	998	0.99	P. helmanticensis
B2C03-PSIA-2-4	June	NE	1001	998	0.99	P. helmanticensis
B2C03-PSIA-2-5	June	NE	1001	1000	0.99	P. chlororaphis
B2C03-PSIA-2-6	June	NE	1001	998	0.99	P. helmanticensis
B2C03-PSIA-2-8	June	NE	1001	999	0.99	P. chlororaphis
B2C11-PSIA-2-2	June	Mix	1001	993	0.99	P. putida
B2C11-PSIA-2-3	June	Mix	1001	994	0.99	P. putida
B2C11-PSIA-2-4	June	Mix	1001	1001	1	P. putida
B2C11-PSIA-2-5	June	Mix	1001	1000	0.99	P. helmanticensis
B2C11-PSIA-2-6	June	Mix	1001	993	0.99	P. putida
B2C13-PSIA-2-10	June	SW	1001	994	0.99	P. putida
B2C13-PSIA-2-11	June	SW	1001	994	0.99	P. putida
B2C13-PSIA-2-12	June	SW	1001	998	0.99	P. baetica
B2C13-PSIA-2-13	June	SW	1001	998	0.99	P. putida
B2C13-PSIA-2-14	June	SW	1001	999	0.99	P. putida
B2C13-PSIA-2-2	June	SW	1001	1001	1	P. putida
B2C13-PSIA-2-3	June	SW	1001	994	0.99	P. putida
B2C13-PSIA-2-4	June	SW	1001	998	0.99	P. putida
B2C13-PSIA-2-7	June	SW	1001	1000	0.99	P. putida
B2C13-PSIA-2-8	June	SW	1001	999	0.99	P. putida
B2C17-PSIA-2-1	June	SW	1001	993	0.99	P. koreensis
B2C17-PSIA-2-10	June	SW	1001	997	0.99	P. baetica
B2C17-PSIA-2-2	June	SW	1001	993	0.99	P. koreensis
B2C17-PSIA-2-3	June	SW	1001	997	0.99	P. helmanticensis
B2C17-PSIA-2-7	June	SW	1001	996	0.99	P. helmanticensis
B2C17-PSIA-2-9	June	SW	1001	997	0.99	P. baetica
B2C19-PSIA-2-1	June	Mix	1001	998	0.99	P. putida
B2C19-PSIA-2-10	June	Mix	1001	998	0.99	P. putida
B2C19-PSIA-2-11	June	Mix	1001	999	0.99	P. koreensis
B2C19-PSIA-2-12	June	Mix	1001	996	0.99	P. helmanticensis
B2C19-PSIA-2-13	June	Mix	1001	990	0.99	P. putida
B2C19-PSIA-2-14	June	Mix	1001	996	0.99	P. fluorescens
B2C19-PSIA-2-15	June	Mix	1001	992	0.99	P. putida
B2C19-PSIA-2-2	June	Mix	1001	998	0.99	P. putida
B2C19-PSIA-2-3	June	Mix	1001	1001	1	P. putida
B2C19-PSIA-2-4	June	Mix	1001	998	0.99	P. fluorescens
B2C19-PSIA-2-5	June	Mix	1001	999	0.99	P. putida
B2C19-PSIA-2-6	June	Mix	1001	992	0.99	P. putida
B2C19-PSIA-2-7	June	Mix	1001	999	0.99	P. putida
B2C19-PSIA-2-9	June	Mix	1001	994	0.99	P. putida
B2C20-PSIA-2-1	June	NE	1001	998	0.99	P. fluorescens
B2C20-PSIA-2-10	June	NE	1001	993	0.99	P. helmanticensis
B2C20-PSIA-2-11	June	NE	750	750	1	P. putida
B2C20-PSIA-2-12	June	NE	1001	993	0.99	P. putida
B2C20-PSIA-2-13	June	NE	1001	999	0.99	P. putida
B2C20-PSIA-2-14	June	NE	1001	997	0.99	P. putida
B2C20-PSIA-2-2	June	NE	1001	998	0.99	P. putida
B2C20-PSIA-2-3	June	NE	1001	998	0.99	P. putida
B2C20-PSIA-2-5	June	NE	1001	993	0.99	P. putida
B2C20-PSIA-2-6	June	NE	1001	1000	0.99	P. putida
B2C20-PSIA-2-7	June	NE	1001	996	0.99	P. helmanticensis
B2C20-PSIA-2-8	June	NE	1001	992	0.99	P. putida
B2C20-PSIA-2-9	June	NE	1001	999	0.99	P. putida
B2C24-PSIA-2-1	June	SW	747	742	0.99	P. fluorescens
B2C24-PSIA-2-10	June	SW	1001	993	0.99	P. putida
B2C24-PSIA-2-11	June	SW	1001	998	0.99	P. helmanticensis
B2C24-PSIA-2-12	June	SW	1001	996	0.99	P. helmanticensis
B2C24-PSIA-2-13	June	SW	1001	994	0.99	P. helmanticensis
B2C24-PSIA-2-15	June	SW	1001	999	0.99	P. vancouverensis
B2C24-PSIA-2-2	June	SW	1001	993	0.99	P. putida
B2C24-PSIA-2-4	June	SW	1001	993	0.99	P. putida
B2C24-PSIA-2-5	June	SW	1001	993	0.99	P. baetica
B2C24-PSIA-2-6	June	SW	1001	999	0.99	P. putida
B2C24-PSIA-2-7	June	SW	1001	993	0.99	P. putida
B2C25-PSIA-2-1	June	NE	1001	1001	1	P. putida
B2C25-PSIA-2-10	June	NE	1001	993	0.99	P. putida
B2C25-PSIA-2-12	June	NE	1001	998	0.99	P. fluorescens
B2C25-PSIA-2-13	June	NE	1001	996	0.99	P. helmanticensis
B2C25-PSIA-2-15	June	NE	1001	998	0.99	P. helmanticensis
B2C25-PSIA-2-2	June	NE	1001	998	0.99	P. helmanticensis
B2C25-PSIA-2-3	June	NE	1001	998	0.99	P. fluorescens
B2C25-PSIA-2-4	June	NE	1001	1000	0.99	P. lini
B2C25-PSIA-2-5	June	NE	1001	997	0.99	P. helmanticensis
B2C25-PSIA-2-7	June	NE	1001	998	0.99	P. helmanticensis
B2C25-PSIA-2-8	June	NE	1001	998	0.99	P. fluorescens
B2C25-PSIA-2-9	June	NE	1001	999	0.99	P. helmanticensis
B3D28-PSIA-2A-1	June	NE	1001	996	0.99	P. fluorescens
B3D28-PSIA-2A-10	June	NE	1001	996	0.99	P. fluorescens
B3D28-PSIA-2A-11	June	NE	1001	996	0.99	P. fluorescens
B3D28-PSIA-2A-12	June	NE	1001	996	0.99	P. fluorescens
B3D28-PSIA-2A-13	June	NE	1001	996	0.99	P. fluorescens
B3D28-PSIA-2A-14	June	NE	1001	996	0.99	P. fluorescens
B3D28-PSIA-2A-15	June	NE	1001	996	0.99	P. fluorescens
B3D28-PSIA-2A-2	June	NE	1001	996	0.99	P. fluorescens
B3D28-PSIA-2A-3	June	NE	1001	996	0.99	P. fluorescens
B3D28-PSIA-2A-4	June	NE	1001	996	0.99	P. fluorescens
B3D28-PSIA-2A-5	June	NE	1001	996	0.99	P. fluorescens
B3D28-PSIA-2A-6	June	NE	1001	996	0.99	P. fluorescens
B3D28-PSIA-2A-7	June	NE	1001	996	0.99	P. fluorescens
B3D28-PSIA-2A-8	June	NE	1001	996	0.99	P. fluorescens
B3D28-PSIA-2A-9	June	NE	1001	996	0.99	P. fluorescens
B3D29-PSIA-2-1	June	SW	853	852	0.99	P. putida
B3D29-PSIA-2-10	June	SW	1001	993	0.99	P. koreensis
B3D29-PSIA-2-11	June	SW	1001	997	0.99	P. koreensis
B3D29-PSIA-2-12	June	SW	840	840	1	P. koreensis
B3D29-PSIA-2-13	June	SW	1001	993	0.99	P. koreensis
B3D29-PSIA-2-2	June	SW	1001	993	0.99	P. fluorescens
B3D29-PSIA-2-3	June	SW	1001	994	0.99	P. koreensis
B3D29-PSIA-2-4	June	SW	1001	996	0.99	P. koreensis
B3D29-PSIA-2-5	June	SW	1001	999	0.99	P. koreensis
B3D29-PSIA-2-7	June	SW	1001	1001	1	P. poae
B3D29-PSIA-2-8	June	SW	1001	998	0.99	P. baetica
B3D29-PSIA-2-9	June	SW	1001	993	0.99	P. baetica
B3D30-PSIA-2A-1	June	Mix	1001	998	0.99	P. fluorescens
B3D30-PSIA-2A-10	June	Mix	1001	998	0.99	P. fluorescens
B3D30-PSIA-2A-11	June	Mix	1001	998	0.99	P. fluorescens
B3D30-PSIA-2A-2	June	Mix	1001	991	0.99	P. koreensis
B3D30-PSIA-2A-8	June	Mix	1001	998	0.99	P. fluorescens
B3D32-PSIA-2A-1	June	Mix	1001	999	0.99	P. putida
B3D32-PSIA-2A-10	June	Mix	1001	999	0.99	P. putida
B3D32-PSIA-2A-11	June	Mix	1001	1001	1	P. putida
B3D32-PSIA-2A-12	June	Mix	1001	999	0.99	P. vancouverensis
B3D32-PSIA-2A-13	June	Mix	1001	999	0.99	P. putida
B3D32-PSIA-2A-15	June	Mix	1001	999	0.99	P. putida
B3D32-PSIA-2A-2	June	Mix	1001	999	0.99	P. vancouverensis
B3D32-PSIA-2A-3	June	Mix	1001	999	0.99	P. putida
B3D32-PSIA-2A-4	June	Mix	1001	999	0.99	P. helmanticensis
B3D32-PSIA-2A-5	June	Mix	1001	999	0.99	P. putida
B3D32-PSIA-2A-6	June	Mix	1001	999	0.99	P. koreensis
B3D32-PSIA-2A-7	June	Mix	1001	1001	1	P. putida
B3D32-PSIA-2A-8	June	Mix	1001	1001	1	P. putida
B3D32-PSIA-2A-9	June	Mix	1001	999	0.99	P. putida
B3D35-PSIA-2A-1	June	Mix	1001	996	0.99	P. fluorescens
B3D39-PSIA-2-1	June	NE	1001	998	0.99	P. fluorescens
B3D39-PSIA-2-2	June	NE	1001	999	0.99	P. koreensis
B3D39-PSIA-2-3	June	NE	1001	989	0.99	P. fluorescens
B3D39-PSIA-2-4	June	NE	1001	998	0.99	P. fluorescens
B4C27-PSIA-2-10	June	SW	1001	999	0.99	P. helmanticensis
B4C27-PSIA-2-11	June	SW	1001	996	0.99	P. fluorescens
B4C27-PSIA-2-12	June	SW	1001	993	0.99	P. helmanticensis
B4C27-PSIA-2-13	June	SW	1001	999	0.99	P. putida
B4C27-PSIA-2-14	June	SW	1001	997	0.99	P. fluorescens
B4C27-PSIA-2-15	June	SW	1001	999	0.99	P. putida
B4C27-PSIA-2-2	June	SW	1001	998	0.99	P. helmanticensis
B4C27-PSIA-2-3	June	SW	1001	999	0.99	P. lini
B4C27-PSIA-2-5	June	SW	1001	994	0.99	P. jessenii
B4C27-PSIA-2-6	June	SW	1001	999	0.99	P. koreensis
B4C27-PSIA-2-7	June	SW	1001	998	0.99	P. baetica
B4C27-PSIA-2-8	June	SW	1001	999	0.99	P. koreensis
B4C27-PSIA-2-9	June	SW	613	611	0.99	P. putida
B4C30-PSIA-2-1	June	Mix	1001	993	0.99	P. koreensis
B4C30-PSIA-2-3	June	Mix	1001	999	0.99	P. vancouverensis
B4C30-PSIA-2-4	June	Mix	1001	996	0.99	P. helmanticensis
B4C30-PSIA-2-5	June	Mix	1001	993	0.99	P. koreensis
B4C30-PSIA-2-6	June	Mix	1001	995	0.99	P. koreensis
B4C30-PSIA-2-7	June	Mix	1001	1001	1	P. putida
B4C30-PSIA-2-8	June	Mix	1001	998	0.99	P. vancouverensis
B4C32-PSIA-2-1	June	Mix	1001	993	0.99	P. fluorescens
B4C32-PSIA-2-10	June	Mix	1001	993	0.99	P. putida
B4C32-PSIA-2-11	June	Mix	1001	998	0.99	P. fluorescens
B4C32-PSIA-2-12	June	Mix	1001	994	0.99	P. putida
B4C32-PSIA-2-13	June	Mix	1001	993	0.99	P. helmanticensis
B4C32-PSIA-2-14	June	Mix	1001	993	0.99	P. putida
B4C32-PSIA-2-15	June	Mix	1001	997	0.99	P. helmanticensis
B4C32-PSIA-2-2	June	Mix	1001	1001	1	P. plecoglossicida
B4C32-PSIA-2-3	June	Mix	1001	1001	1	P. lini
B4C32-PSIA-2-4	June	Mix	1001	994	0.99	P. helmanticensis
B4C32-PSIA-2-5	June	Mix	1001	1001	1	P. putida
B4C32-PSIA-2-7	June	Mix	1001	996	0.99	P. koreensis
B4C32-PSIA-2-9	June	Mix	1001	995	0.99	P. helmanticensis
B4C36-PSIA-2-1	June	SW	1001	998	0.99	P. putida
B4C36-PSIA-2-10	June	SW	1001	999	0.99	P. putida
B4C36-PSIA-2-11	June	SW	1001	995	0.99	P. baetica
B4C36-PSIA-2-12	June	SW	553	552	0.99	P. flavescens
B4C36-PSIA-2-13	June	SW	1001	999	0.99	P. putida
B4C36-PSIA-2-14	June	SW	1001	999	0.99	P. koreensis
B4C36-PSIA-2-15	June	SW	1001	993	0.99	P. helmanticensis
B4C36-PSIA-2-2	June	SW	1001	1000	0.99	P. putida
B4C36-PSIA-2-4	June	SW	1001	996	0.99	P. baetica
B4C36-PSIA-2-5	June	SW	1001	995	0.99	P. baetica
B4C36-PSIA-2-6	June	SW	1001	996	0.99	P. baetica
B4C36-PSIA-2-7	June	SW	882	880	0.99	P. putida
B4C36-PSIA-2-8	June	SW	1001	1001	1	P. putida
B4C36-PSIA-2-9	June	SW	1001	996	0.99	P. baetica
B4C37-PSIA-2-1	June	Mix	982	979	0.99	P. vancouverensis
B4C37-PSIA-2-3	June	Mix	1001	995	0.99	P. fluorescens
B4C37-PSIA-2-5	June	Mix	865	865	1	P. koreensis
B4C37-PSIA-2-6	June	Mix	1001	995	0.99	P. jessenii
B4C38-PSIA-2-1	June	NE	1001	997	0.99	P. putida
B4C38-PSIA-2-11	June	NE	1001	998	0.99	P. azotoformans
B4C38-PSIA-2-12	June	NE	1001	998	0.99	P. migulae
B4C38-PSIA-2-13	June	NE	1001	997	0.99	P. helmanticensis
B4C38-PSIA-2-14	June	NE	1001	998	0.99	P. koreensis
B4C38-PSIA-2-2	June	NE	1001	996	0.99	P. fluorescens
B4C38-PSIA-2-3	June	NE	515	513	0.99	P. fluorescens
B4C38-PSIA-2-5	June	NE	1001	993	0.99	P. putida
B4C38-PSIA-2-7	June	NE	965	962	0.99	P. putida
B4C38-PSIA-2-8	June	NE	1001	998	0.99	P. vancouverensis
B4C39-PSIA-2-10	June	NE	1001	988	0.99	P. putida
B4C39-PSIA-2-11	June	NE	1001	995	0.99	P. fluorescens
B4C39-PSIA-2-12	June	NE	1001	999	0.99	P. corrugata
B4C39-PSIA-2-13	June	NE	888	886	0.99	P. baetica
B4C39-PSIA-2-15	June	NE	1001	998	0.99	P. baetica
B4C39-PSIA-2-2	June	NE	1001	993	0.99	P. putida
B4C39-PSIA-2-6	June	NE	751	751	1	P. koreensis
B4C39-PSIA-2-7	June	NE	1001	992	0.99	P. putida
B4C39-PSIA-2-8	June	NE	1001	990	0.99	P. putida
B4C39-PSIA-2-9	June	NE	942	941	0.99	P. baetica
B1D02-PSIA-1-1	September	NE	811	805	0.99	P. umsongensis
B1D06-PSIA-1A-1	September	NE	1000	997	0.99	P. koreensis
B1D06-PSIA-1A-6	September	NE	1001	999	0.99	P. koreensis
B1D07-PSIA-1A-1	September	Mix	1001	998	0.99	P. vancouverensis
B1D07-PSIA-1A-10	September	Mix	1001	998	0.99	P. vancouverensis
B1D07-PSIA-1A-11	September	Mix	1001	998	0.99	P. vancouverensis
B1D07-PSIA-1A-12	September	Mix	1001	998	0.99	P. vancouverensis
B1D07-PSIA-1A-13	September	Mix	1001	998	0.99	P. vancouverensis
B1D07-PSIA-1A-14	September	Mix	1001	998	0.99	P. vancouverensis
B1D07-PSIA-1A-15	September	Mix	1001	999	0.99	P. helmanticensis
B1D07-PSIA-1A-2	September	Mix	1001	997	0.99	P. fluorescens
B1D07-PSIA-1A-3	September	Mix	1001	998	0.99	P. vancouverensis
B1D07-PSIA-1A-4	September	Mix	1001	998	0.99	P. helmanticensis
B1D07-PSIA-1A-6	September	Mix	1001	999	0.99	P. helmanticensis
B1D07-PSIA-1A-7	September	Mix	1001	998	0.99	P. vancouverensis
B1D07-PSIA-1A-8	September	Mix	635	635	1	P. lini
B1D10-PSIA-1A-1	September	NE	1001	999	0.99	P. koreensis
B1D10-PSIA-1A-3	September	NE	995	992	0.99	P. fluorescens
B1D11-PSIA-1-1	September	SW	1001	999	0.99	P. koreensis
B1D11-PSIA-1-2	September	SW	1001	999	0.99	P. koreensis
B1D11-PSIA-1-3	September	SW	1001	999	0.99	P. koreensis
B1D11-PSIA-1-4	September	SW	1001	999	0.99	P. koreensis
B1D11-PSIA-1-5	September	SW	1001	999	0.99	P. koreensis
B1D11-PSIA-1-6	September	SW	1001	999	0.99	P. koreensis
B1D11-PSIA-1-7	September	SW	998	996	0.99	P. koreensis
B1D14-PSIA-1A-1	September	Mix	1001	992	0.99	P. koreensis
B1D14-PSIA-1A-2	September	Mix	1001	992	0.99	P. koreensis
B1D14-PSIA-1A-3	September	Mix	1001	992	0.99	P. koreensis
B1D19-PSIA-1A-1	September	SW	1001	999	0.99	P. koreensis
B1D19-PSIA-1A-10	September	SW	1001	999	0.99	P. koreensis
B1D19-PSIA-1A-11	September	SW	1001	998	0.99	P. fluorescens
B1D19-PSIA-1A-2	September	SW	1001	998	0.99	P. fluorescens
B1D19-PSIA-1A-3	September	SW	1001	998	0.99	P. fluorescens
B1D19-PSIA-1A-5	September	SW	1001	998	0.99	P. fluorescens
B1D19-PSIA-1A-6	September	SW	1001	998	0.99	P. fluorescens
B1D19-PSIA-1A-7	September	SW	1001	998	0.99	P. fluorescens
B1D19-PSIA-1A-8	September	SW	1001	999	0.99	P. koreensis
B1D19-PSIA-1A-9	September	SW	1001	998	0.99	P. fluorescens
B1D21-PSIA-1-1	September	SW	1001	1001	1	P. putida
B1D21-PSIA-1-10	September	SW	1001	1001	1	P. putida
B1D21-PSIA-1-2	September	SW	1001	1001	1	P. putida
B1D21-PSIA-1-3	September	SW	1001	1001	1	P. putida
B1D21-PSIA-1-6	September	SW	1001	1001	1	P. putida
B2C03-PSIA-1-11	September	NE	997	988	0.99	P. helmanticensis
B2C03-PSIA-1-12	September	NE	1001	991	0.99	P. helmanticensis
B2C03-PSIA-1-13	September	NE	998	990	0.99	P. helmanticensis
B2C03-PSIA-1-14	September	NE	1001	993	0.99	P. helmanticensis
B2C03-PSIA-1-16	September	NE	1001	992	0.99	P. helmanticensis
B2C03-PSIA-1-4	September	NE	1001	999	0.99	P. koreensis
B2C03-PSIA-1-5	September	NE	1001	991	0.99	P. fluorescens
B2C03-PSIA-1-6	September	NE	966	965	0.99	P. koreensis
B2C03-PSIA-1-7	September	NE	966	957	0.99	P. helmanticensis
B2C03-PSIA-1-8	September	NE	1000	989	0.99	P. helmanticensis
B2C03-PSIA-1-9	September	NE	1001	991	0.99	P. helmanticensis
B2C11-PSIA-1-1	September	Mix	1001	998	0.99	P. koreensis
B2C11-PSIA-1-2	September	Mix	999	999	0.99	P. putida
B2C11-PSIA-1-4	September	Mix	1001	996	0.99	P. koreensis
B2C11-PSIA-1-5	September	Mix	975	970	0.99	P. corrugata
B2C11-PSIA-1-7	September	Mix	982	980	0.99	P. putida
B2C11-PSIA-1-8	September	Mix	1001	1000	0.99	P. putida
B2C13-PSIA-1-1	September	SW	880	879	0.99	P. putida
B2C13-PSIA-1-10	September	SW	1001	1001	1	P. putida
B2C13-PSIA-1-11	September	SW	1001	1000	0.99	P. putida
B2C13-PSIA-1-2	September	SW	1001	1001	1	P. putida
B2C13-PSIA-1-3	September	SW	1001	1001	1	P. putida
B2C13-PSIA-1-4	September	SW	1001	1001	1	P. putida
B2C13-PSIA-1-6	September	SW	897	897	1	P. putida
B2C13-PSIA-1-7	September	SW	1001	995	0.99	P. fluorescens
B2C13-PSIA-1-8	September	SW	1001	1001	1	P. putida
B2C13-PSIA-1-9	September	SW	1001	999	0.99	P. putida
B2C17-PSIA-1-1	September	SW	1001	1001	1	P. putida
B2C17-PSIA-1-2	September	SW	1001	1001	1	P. putida
B2C17-PSIA-1-3	September	SW	1001	1001	1	P. putida
B2C17-PSIA-1-4	September	SW	1001	1001	1	P. putida
B2C17-PSIA-1-6	September	SW	1001	1001	1	P. putida
B2C17-PSIA-1-7	September	SW	1001	1001	1	P. putida
B2C19-PSIA-1-10	September	Mix	1001	1001	1	P. putida
B2C19-PSIA-1-2	September	Mix	1001	1001	1	P. putida
B2C19-PSIA-1-3	September	Mix	1001	1001	1	P. putida
B2C19-PSIA-1-4	September	Mix	1001	1001	1	P. putida
B2C19-PSIA-1-5	September	Mix	1001	997	0.99	P. koreensis
B2C19-PSIA-1-6	September	Mix	1001	1001	1	P. putida
B2C19-PSIA-1-7	September	Mix	1001	997	0.99	P. fluorescens
B2C19-PSIA-1-8	September	Mix	1001	999	0.99	P. putida
B2C19-PSIA-1-9	September	Mix	1001	1001	1	P. putida
B2C20-PSIA-1-1	September	NE	1001	998	0.99	P. koreensis
B2C20-PSIA-1-2	September	NE	1001	998	0.99	P. putida
B2C20-PSIA-1-3	September	NE	974	969	0.99	P. fluorescens
B2C20-PSIA-1-4	September	NE	991	987	0.99	P. koreensis
B2C20-PSIA-1-7	September	NE	1001	997	0.99	P. putida
B2C20-PSIA-1-9	September	NE	1001	999	0.99	P. putida
B2C24-PSIA-1-1	September	SW	1001	1000	0.99	P. putida
B2C24-PSIA-1-10	September	SW	1001	999	0.99	P. koreensis
B2C24-PSIA-1-2	September	SW	1001	1000	0.99	P. putida
B2C24-PSIA-1-5	September	SW	1001	1001	1	P. putida
B2C24-PSIA-1-6	September	SW	1001	998	0.99	P. koreensis
B2C24-PSIA-1-7	September	SW	1001	999	0.99	P. putida
B2C24-PSIA-1-8	September	SW	1001	997	0.99	P. putida
B2C24-PSIA-1-9	September	SW	1001	999	0.99	P. putida
B2C25-PSIA-1-1	September	NE	1001	993	0.99	P. koreensis
B2C25-PSIA-1-10	September	NE	1001	998	0.99	P. fluorescens
B2C25-PSIA-1-11	September	NE	1001	998	0.99	P. helmanticensis
B2C25-PSIA-1-2	September	NE	1001	993	0.99	P. koreensis
B2C25-PSIA-1-3	September	NE	1001	999	0.99	P. koreensis
B2C25-PSIA-1-4	September	NE	1001	993	0.99	P. koreensis
B2C25-PSIA-1-5	September	NE	1001	993	0.99	P. koreensis
B2C25-PSIA-1-7	September	NE	1001	993	0.99	P. koreensis
B2C25-PSIA-1-8	September	NE	1001	999	0.99	P. koreensis
B3D28-PSIA-1-1	September	NE	1001	907	0.91	P. putida
B3D28-PSIA-1-10	September	NE	1001	997	0.99	P. baetica
B3D28-PSIA-1-13	September	NE	1001	998	0.99	P. baetica
B3D28-PSIA-1-14	September	NE	1001	998	0.99	P. baetica
B3D28-PSIA-1-15	September	NE	1001	998	0.99	P. putida
B3D28-PSIA-1-2	September	NE	1001	999	0.99	P. putida
B3D28-PSIA-1-3	September	NE	1001	997	0.99	P. baetica
B3D28-PSIA-1-4	September	NE	1001	999	0.99	P. koreensis
B3D28-PSIA-1-5	September	NE	1001	998	0.99	P. baetica
B3D28-PSIA-1-6	September	NE	1001	998	0.99	P. baetica
B3D28-PSIA-1-7	September	NE	1001	998	0.99	P. baetica
B3D28-PSIA-1-8	September	NE	1001	996	0.99	P. putida
B3D28-PSIA-1-9	September	NE	1001	997	0.99	P. baetica
B3D29-PSIA-1-1	September	SW	1001	993	0.99	P. koreensis
B3D29-PSIA-1-2	September	SW	1001	993	0.99	P. koreensis
B3D29-PSIA-1-3	September	SW	1001	993	0.99	P. koreensis
B3D29-PSIA-1-4	September	SW	1001	993	0.99	P. koreensis
B3D29-PSIA-1-5	September	SW	1001	993	0.99	P. koreensis
B3D29-PSIA-1-6	September	SW	1001	993	0.99	P. koreensis
B3D30-PSIA-1-1	September	Mix	1001	998	0.99	P. fluorescens
B3D30-PSIA-1-10	September	Mix	1001	1001	1	P. putida
B3D30-PSIA-1-2	September	Mix	1001	998	0.99	P. fluorescens
B3D30-PSIA-1-3	September	Mix	1001	992	0.99	P. vranovensis
B3D30-PSIA-1-4	September	Mix	1001	1000	0.99	P. putida
B3D30-PSIA-1-5	September	Mix	1001	999	0.99	P. putida
B3D30-PSIA-1-6	September	Mix	1001	998	0.99	P. fluorescens
B3D30-PSIA-1-7	September	Mix	1001	998	0.99	P. fluorescens
B3D30-PSIA-1-8	September	Mix	1001	998	0.99	P. fluorescens
B3D30-PSIA-1-9	September	Mix	1001	998	0.99	P. fluorescens
B3D34-PSIA-1-1	September	SW	1001	993	0.99	P. baetica
B3D34-PSIA-1-10	September	SW	1001	993	0.99	P. baetica
B3D34-PSIA-1-11	September	SW	1001	993	0.99	P. baetica
B3D34-PSIA-1-12	September	SW	1001	993	0.99	P. baetica
B3D34-PSIA-1-13	September	SW	1001	994	0.99	P. baetica
B3D34-PSIA-1-2	September	SW	1001	993	0.99	P. baetica
B3D34-PSIA-1-3	September	SW	1001	998	0.99	P. fluorescens
B3D34-PSIA-1-4	September	SW	1001	993	0.99	P. baetica
B3D34-PSIA-1-5	September	SW	1001	993	0.99	P. baetica
B3D34-PSIA-1-6	September	SW	1001	992	0.99	P. baetica
B3D34-PSIA-1-7	September	SW	1001	993	0.99	P. baetica
B3D34-PSIA-1-9	September	SW	1001	993	0.99	P. baetica
B3D35-PSIA-1-1	September	Mix	1001	989	0.99	P. fluorescens
B3D35-PSIA-1-2	September	Mix	1001	998	0.99	P. fluorescens
B3D35-PSIA-1-3	September	Mix	1001	989	0.99	P. fluorescens
B3D35-PSIA-1-4	September	Mix	1001	989	0.99	P. fluorescens
B3D35-PSIA-1-5	September	Mix	1001	999	0.99	P. koreensis
B3D35-PSIA-1-6	September	Mix	1001	989	0.99	P. fluorescens
B3D35-PSIA-1-7	September	Mix	1001	989	0.99	P. fluorescens
B3D39-PSIA-1-1	September	NE	1001	998	0.99	P. helmanticensis
B3D39-PSIA-1-2	September	NE	1001	998	0.99	P. koreensis
B3D39-PSIA-1-3	September	NE	1001	993	0.99	P. fluorescens
B3D39-PSIA-1-4	September	NE	1001	995	0.99	P. helmanticensis
B3D39-PSIA-1-5	September	NE	1001	992	0.99	P. helmanticensis
B3D39-PSIA-1-6	September	NE	1001	993	0.99	P. fluorescens
B3D39-PSIA-1-7	September	NE	1001	998	0.99	P. putida
B3D39-PSIA-1-8	September	NE	1001	992	0.99	P. helmanticensis
B3D39-PSIA-1-9	September	NE	1001	992	0.99	P. helmanticensis
B4C27-PSIA-1-1	September	SW	1001	989	0.99	P. fluorescens
B4C27-PSIA-1-2	September	SW	1001	998	0.99	P. fluorescens
B4C27-PSIA-1-3	September	SW	897	897	1	P. putida
B4C27-PSIA-1-4	September	SW	789	780	0.99	P. fluorescens
B4C27-PSIA-1-5	September	SW	856	851	0.99	P. putida
B4C27-PSIA-1-6	September	SW	783	783	1	P. putida
B4C30-PSIA-1-1	September	Mix	1001	997	0.99	P. baetica
B4C30-PSIA-1-2	September	Mix	1001	997	0.99	P. baetica
B4C30-PSIA-1-3	September	Mix	1001	997	0.99	P. baetica
B4C30-PSIA-1-5	September	Mix	1001	992	0.99	P. helmanticensis
B4C32-PSIA-1-1	September	Mix	1001	1001	1	P. putida
B4C32-PSIA-1-10	September	Mix	1001	989	0.99	P. fluorescens
B4C32-PSIA-1-11	September	Mix	1001	989	0.99	P. fluorescens
B4C32-PSIA-1-12	September	Mix	1001	998	0.99	P. putida
B4C32-PSIA-1-13	September	Mix	1001	989	0.99	P. fluorescens
B4C32-PSIA-1-14	September	Mix	1001	1001	1	P. putida
B4C32-PSIA-1-15	September	Mix	1001	1001	1	P. putida
B4C32-PSIA-1-16	September	Mix	1001	1001	1	P. poae
B4C32-PSIA-1-2	September	Mix	1001	1001	1	P. putida
B4C32-PSIA-1-3	September	Mix	1001	1001	1	P. putida
B4C32-PSIA-1-5	September	Mix	1001	1001	1	P. putida
B4C32-PSIA-1-6	September	Mix	1001	1001	1	P. putida
B4C32-PSIA-1-7	September	Mix	1001	998	0.99	P. putida
B4C32-PSIA-1-8	September	Mix	1001	1001	1	P. putida
B4C32-PSIA-1-9	September	Mix	1001	1001	1	P. putida
B4C36-PSIA-1-1	September	SW	1001	1001	1	P. putida
B4C36-PSIA-1-2	September	SW	1001	1001	1	P. putida
B4C36-PSIA-1-3	September	SW	1001	1001	1	P. putida
B4C36-PSIA-1-4	September	SW	1001	1001	1	P. putida
B4C37-PSIA-1-1	September	Mix	1001	998	0.99	P. helmanticensis
B4C37-PSIA-1-2	September	Mix	1001	998	0.99	P. helmanticensis
B4C37-PSIA-1-3	September	Mix	1001	1000	0.99	P. putida
B4C37-PSIA-1-5	September	Mix	982	982	1	P. putida
B4C38-PSIA-1-1	September	NE	1001	1001	1	P. putida
B4C38-PSIA-1-2	September	NE	1001	998	0.99	P. helmanticensis
B4C38-PSIA-1-3	September	NE	1001	998	0.99	P. koreensis
B4C38-PSIA-1-4	September	NE	1001	989	0.99	P. fluorescens
B4C38-PSIA-1-5	September	NE	1001	998	0.99	P. baetica
B4C38-PSIA-1-6	September	NE	1001	999	0.99	P. koreensis
B4C38-PSIA-1-7	September	NE	1001	998	0.99	P. fluorescens
B4C38-PSIA-1-8	September	NE	1001	999	0.99	P. helmanticensis
B4C39-PSIA-1-1	September	NE	1001	996	0.99	P. helmanticensis
B4C39-PSIA-1-10	September	NE	1001	1001	1	P. putida
B4C39-PSIA-1-12	September	NE	1001	1000	0.99	P. putida
B4C39-PSIA-1-14	September	NE	1001	997	0.99	P. baetica
B4C39-PSIA-1-15	September	NE	1001	995	0.99	P. putida
B4C39-PSIA-1-3	September	NE	1001	999	0.99	P. koreensis
B4C39-PSIA-1-4	September	NE	1001	998	0.99	P. putida
B4C39-PSIA-1-5	September	NE	1001	1000	0.99	P. putida
B4C39-PSIA-1-6	September	NE	1001	998	0.99	P. koreensis
B4C39-PSIA-1-7	September	NE	1001	996	0.99	P. koreensis
B4C39-PSIA-1-8	September	NE	1001	1001	1	P. putida
